# Supplementary material for: Olanzapine combined with 5-hydroxytryptamine type 3 receptor antagonist (5-HT3 RA) plus dexamethasone for prevention and treatment of chemotherapy-induced nausea and vomiting in high and moderate emetogenic chemotherapy: a systematic review and meta-analysis of randomised controlled trials
Source: PubMed Central journal article supplement — ESMO Open. 2020 Feb 19;5(1):e000621. doi: 10.1136/esmoopen-2019-000621 (PMC7046384; doi:10.1136/esmoopen-2019-000621), 2020-02-19
Supplement: esmoopen-2019-000621supp002.pdf [file esmoopen-2019-000621supp002.pdf]

#1 (((2-Methyl-4- AND (4-methyl-1-piperazinyl) AND -10H-thieno AND (2,3-b) AND (1,5) AND benzodiazepine[Title/Abstract]) OR LY-170052[Title/Abstract]) OR LY 170052[Title/Abstract]) OR LY170052[Title/Abstract]) OR Zyprexa[Title/Abstract]) OR Zolafren[Title/Abstract]) OR LY 170053[Title/Abstract]) OR Olanzapine Pamoate[Title/Abstract])) OR "Olanzapine"[Mesh]))

#2 ((((((chemotherapy-induced nausea[Title/Abstract] AND vomiting[Title/Abstract])) OR CINV[Title/Abstract]) OR vomiting[Title/Abstract]) OR emesis[Title/Abstract]) OR nausea[Title/Abstract])

#3 #1 AND #2
