# Supplementary material for: Olanzapine combined with 5-hydroxytryptamine type 3 receptor antagonist (5-HT3 RA) plus dexamethasone for prevention and treatment of chemotherapy-induced nausea and vomiting in high and moderate emetogenic chemotherapy: a systematic review and meta-analysis of randomised controlled trials
Source: PubMed Central journal article supplement — ESMO Open. 2020 Feb 19;5(1):e000621. doi: 10.1136/esmoopen-2019-000621 (PMC7046384; doi:10.1136/esmoopen-2019-000621), 2020-02-19
Supplement: esmoopen-2019-000621supp004.pdf [file esmoopen-2019-000621supp004.pdf]

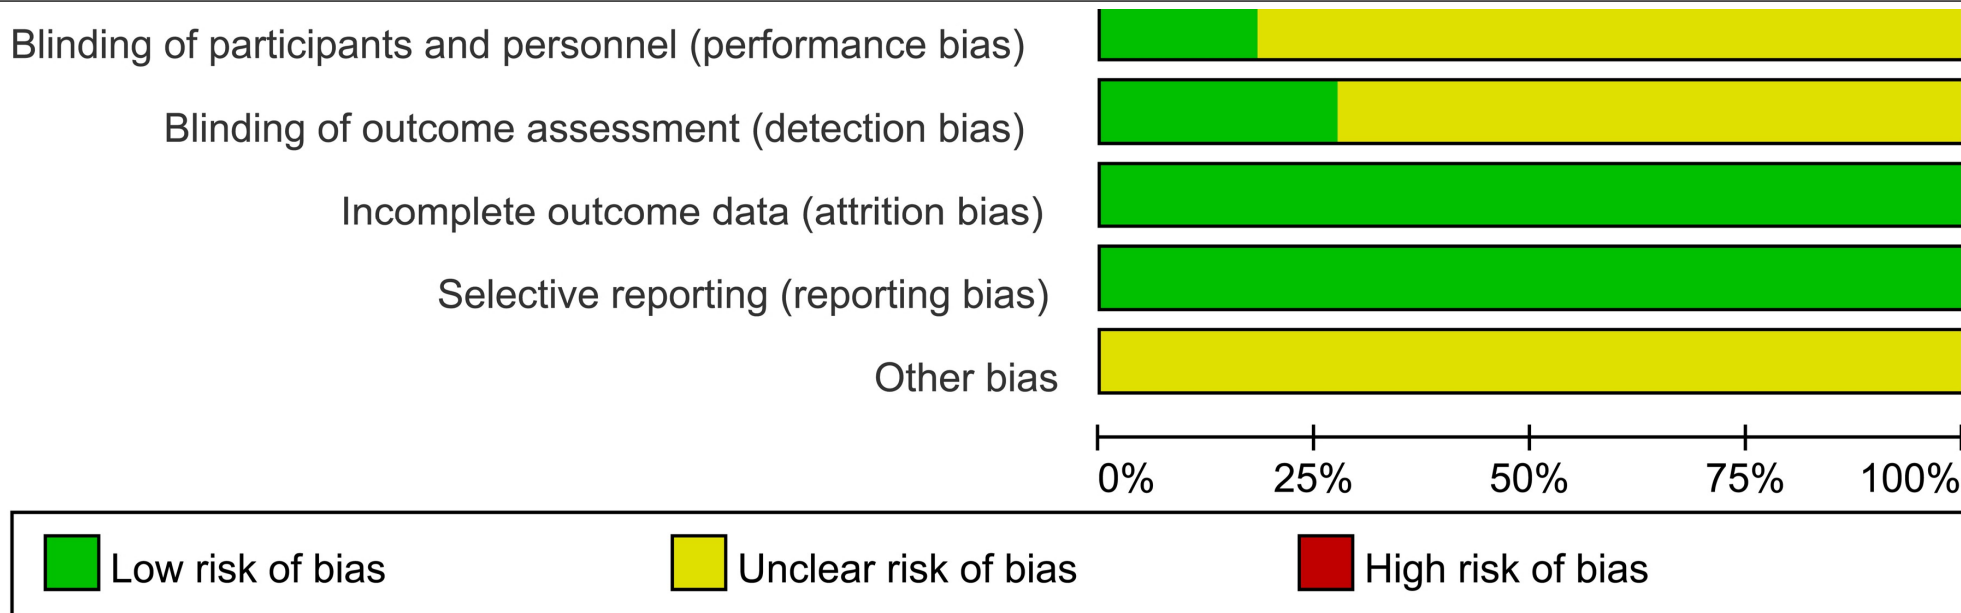

| Study      | Random sequence generation (selection bias) | Allocation concealment (selection bias) | Blinding of participants and personnel (performance bias) | Blinding of outcome assessment (detection bias) | Incomplete outcome data (attrition bias) |
|------------|---------------------------------------------|-----------------------------------------|-----------------------------------------------------------|-------------------------------------------------|------------------------------------------|
| Chen2015   | ?                                           | -                                       | ?                                                         | ?                                               | +                                        |
| Guo2018    | ?                                           | -                                       | ?                                                         | ?                                               | +                                        |
| He2018     | +                                           | -                                       | ?                                                         | ?                                               | +                                        |
| Li2015     | ?                                           | -                                       | ?                                                         | ?                                               | +                                        |
| Liu2017    | ?                                           | -                                       | ?                                                         | +                                               | +                                        |
| Meng2016   | ?                                           | -                                       | +                                                         | +                                               | +                                        |
| Sandip2017 | +                                           | +                                       | +                                                         | +                                               | +                                        |
| Tian2009   | +                                           | -                                       | ?                                                         | ?                                               | +                                        |
| Tian2017   | ?                                           | -                                       | ?                                                         | ?                                               | +                                        |
| Wang2016   | ?                                           | -                                       | ?                                                         | ?                                               | +                                        |
| Zhao2018   | +                                           | -                                       | ?                                                         | ?                                               | +                                        |
