# Supplementary figures and images for: Olanzapine combined with 5-hydroxytryptamine type 3 receptor antagonist (5-HT3 RA) plus dexamethasone for prevention and treatment of chemotherapy-induced nausea and vomiting in high and moderate emetogenic chemotherapy: a systematic review and meta-analysis of randomised controlled trials
Source: PubMed Central journal article supplement — ESMO Open. 2020 Feb 19;5(1):e000621. doi: 10.1136/esmoopen-2019-000621 (PMC7046384; doi:10.1136/esmoopen-2019-000621), 2020-02-19

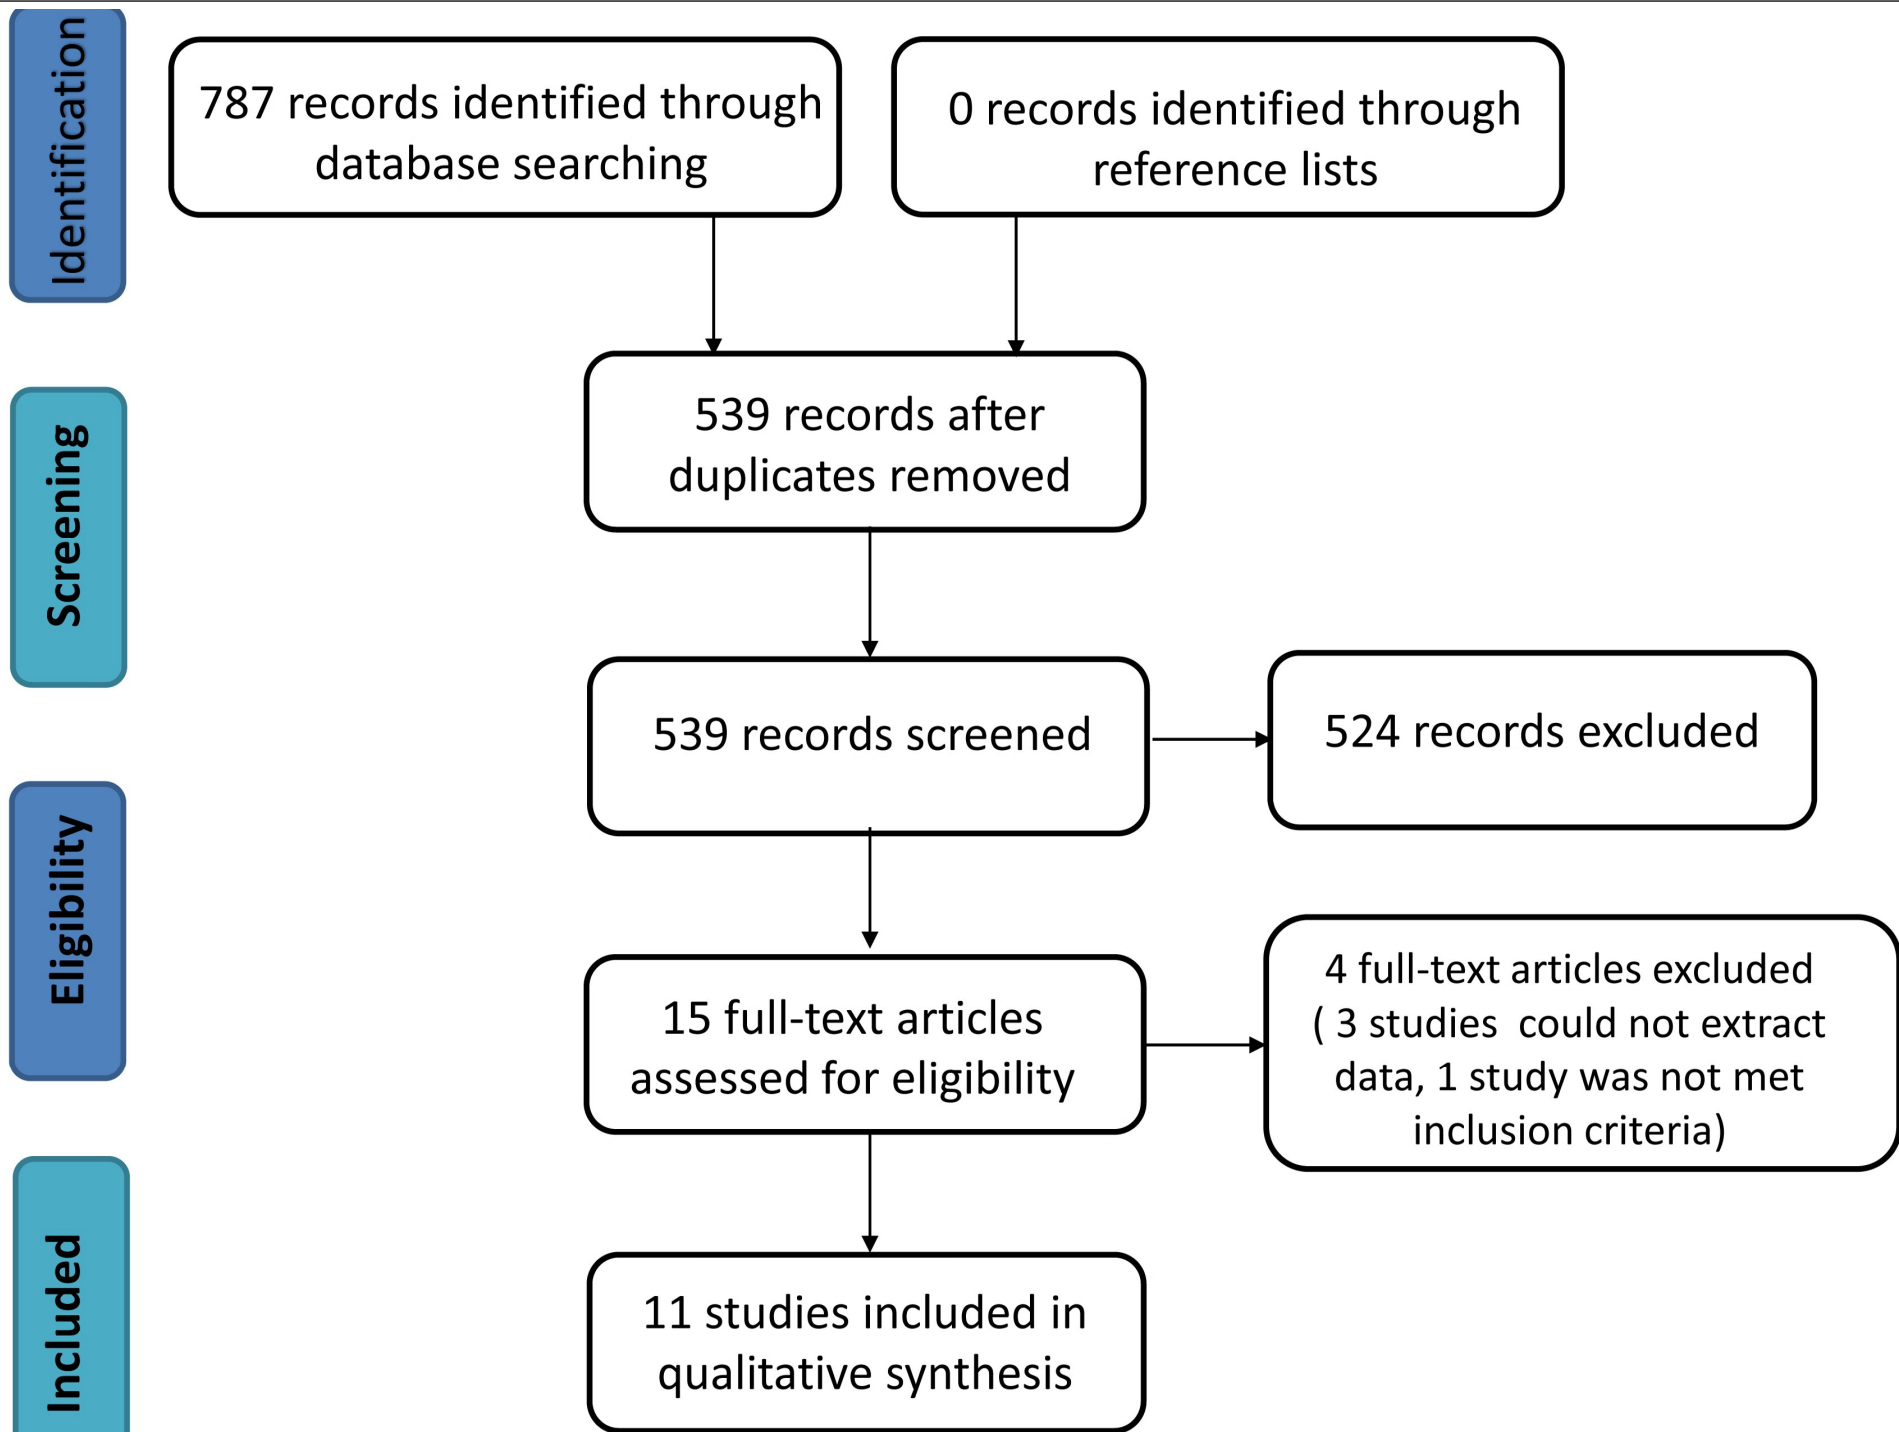

Supplement: esmoopen-2019-000621supp003.pdf [file esmoopen-2019-000621supp003.pdf]
